# Supplementary material
Source: PubMed Central journal article supplement (PMC5333940)
Supplement: NIHMS852440-supplement-Supplemental_Information.pdf [file NIHMS852440-supplement-Supplemental_Information.pdf]

# Supplementary Fig. S1

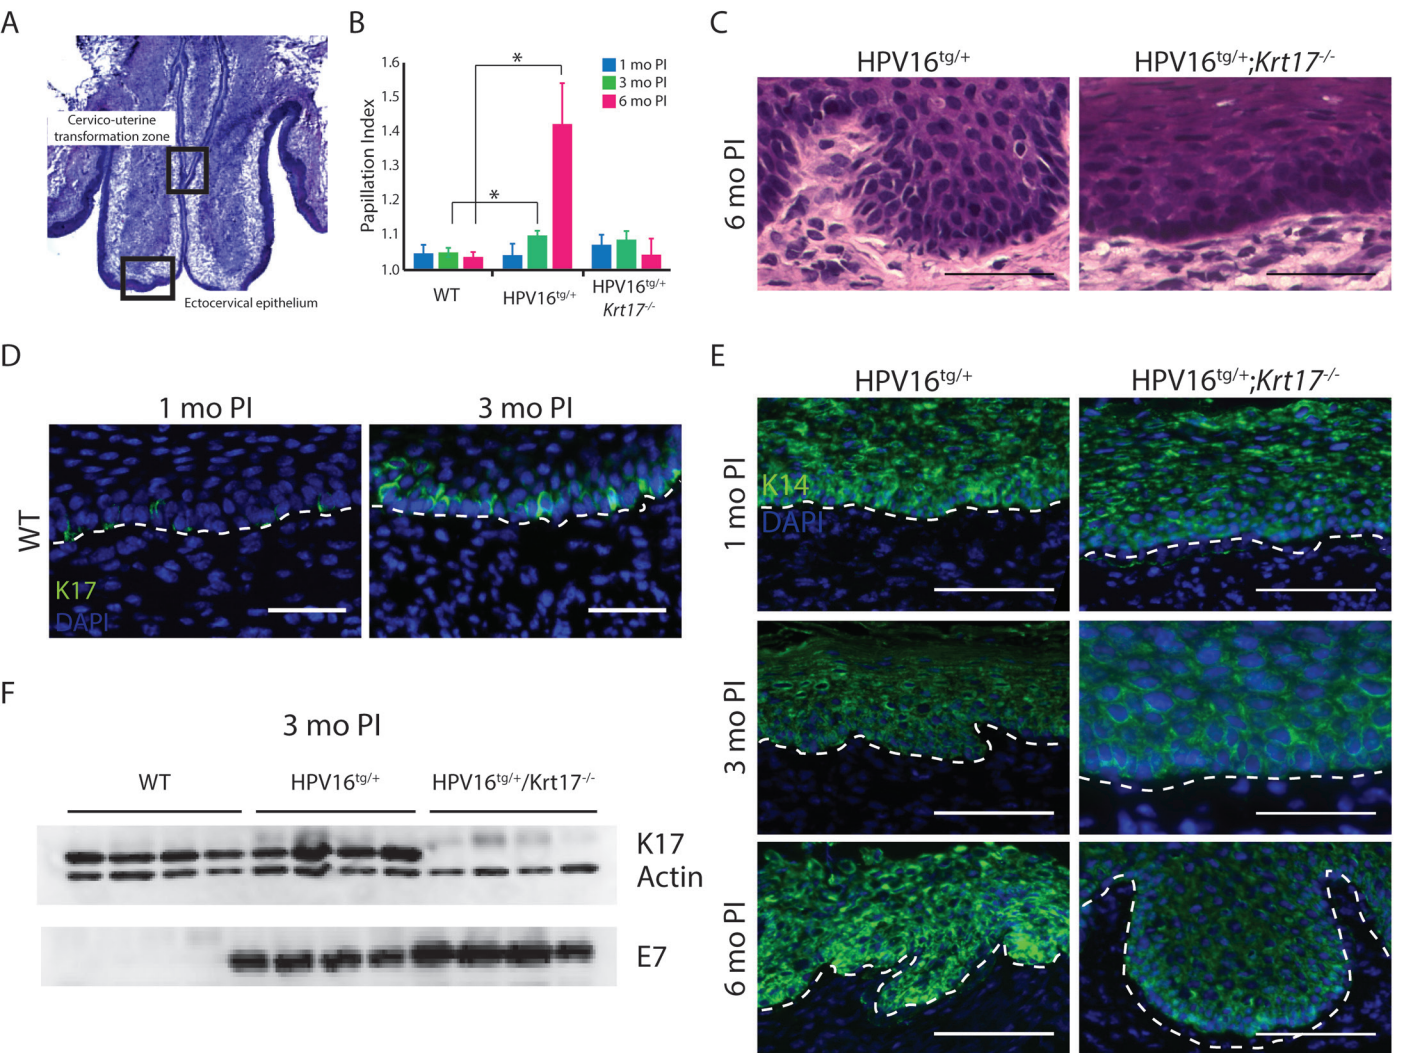

**Supplementary Fig. S1: Characterization of cervical epithelium in HPV16<sup>tg/+</sup> mice.** **A)** Reconstructed image from low-magnification (5x) micrographs covering the entire mouse cervix. Boxed regions highlight the cervico-uterine transformation zone and ectocervical epithelium. **B)** Quantitation of epithelial papillation in transformation zone epithelia for WT, HPV16<sup>tg/+</sup>, and HPV16<sup>tg/+</sup>;Krt17<sup>-/-</sup> mice at 1-, 3-, and 6-mo post-implantation. Error bars are s.e.m. \*p<0.05 (Student's T-test). **C)** H&E staining of transformation zone epithelium for HPV16<sup>tg/+</sup> and HPV16<sup>tg/+</sup>;Krt17<sup>-/-</sup> mice at 6-mo post-implantation. Bar = 100  $\mu$ m. This panel accompanies Fig. 1A. **D)** Immunostaining for K17 in transformation zone epithelium of WT mice at 1-mo (left) and 3-mo (right) post-implantation. Nuclei are stained with DAPI (blue). Dotted line separates epithelium (above line) from underlying stroma (below line). Bar = 100  $\mu$ m. **E)** Immunostaining for K14 in transformation zone epithelium of HPV16<sup>tg/+</sup> (top) and HPV16<sup>tg/+</sup>;Krt17<sup>-/-</sup> (bottom) mice at 1-, 3-, and 6-mo post-implantation. Nuclei are stained with DAPI (blue). Dotted line separates epithelium (above line) from underlying stroma (below line). Bar = 100  $\mu$ m. **F)** Immunoblots for K17, Actin, and HPV E7 in cervical tissue of WT, HPV16<sup>tg/+</sup>, and HPV16<sup>tg/+</sup>;Krt17<sup>-/-</sup> mice at 3-mo post-implantation. Each lane represents a distinct biological replicate.

# Supplementary Fig. S2

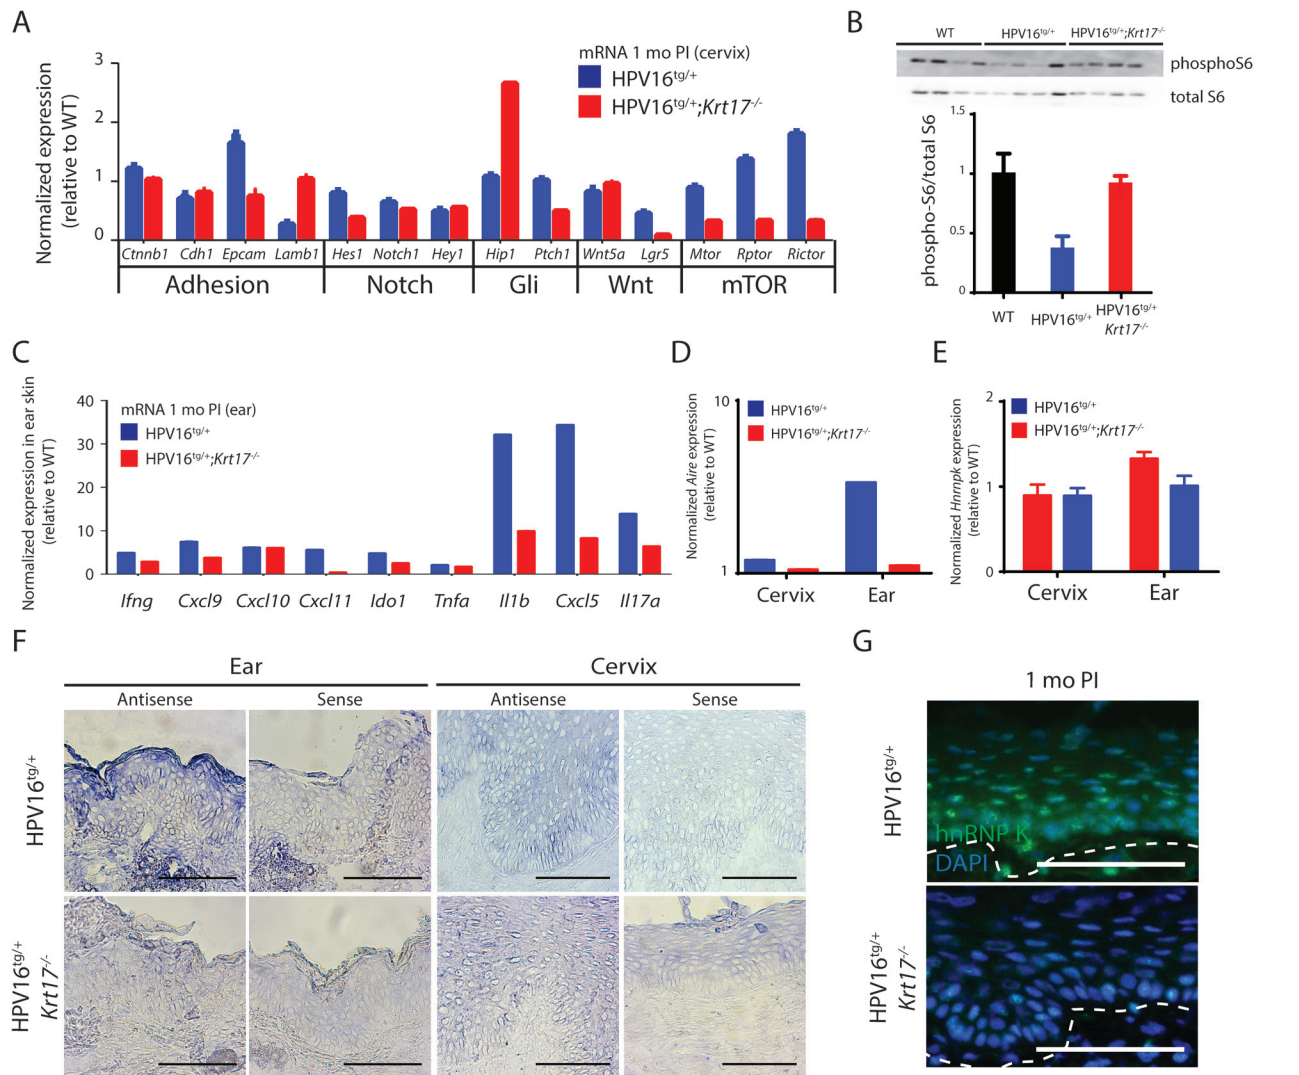

**Supplementary Fig. S2: Assessment of Aire and hnRNP K in cervical and ear tissues.**

**A)** Normalized expression for gene transcripts associated with adhesion, Notch, Gli, Wnt, and mTOR signaling in cervical tissue of HPV16<sup>tg/+</sup> and HPV16<sup>tg/+</sup>;Krt17<sup>-/-</sup> mice at 1-mo post-implantation. Error bars are s.e.m. **B)** Immunoblots for phospho-S6 and total S6 in cervical tissue of WT, HPV16<sup>tg/+</sup>, and HPV16<sup>tg/+</sup>;Krt17<sup>-/-</sup> mice at 1-mo post-implantation. Each lane represents a distinct biological replicate. Densitometric quantification of phospho-S6/total S6 shown below. **C)** Normalized expression for inflammation associated gene transcripts in ear tissue of HPV16<sup>tg/+</sup> and HPV16<sup>tg/+</sup>;Krt17<sup>-/-</sup> mice at 1-mo post-implantation. Error bars are s.e.m. This panel accompanies Fig. 3B. **D)** Normalized expression for Aire transcript in cervical and ear tissues of HPV16<sup>tg/+</sup> and HPV16<sup>tg/+</sup>;Krt17<sup>-/-</sup> mice at 1-mo post-implantation. Error bars are s.e.m. **E)** Normalized expression for *Hnnpk* transcript in cervical and ear tissues of HPV16<sup>tg/+</sup> and HPV16<sup>tg/+</sup>;Krt17<sup>-/-</sup> mice at 1-mo post-implantation. Error bars are s.e.m. **F)** RNA *in situ* hybridization for *Aire* gene transcript in ear (left) and cervical (right) tissues of HPV16<sup>tg/+</sup> and HPV16<sup>tg/+</sup>;Krt17<sup>-/-</sup> mice at 1-mo post-implantation. Signals from both antisense and sense probes are shown. Bar = 100  $\mu$ m. **G)** Immunostaining for hnRNP K in transformation zone epithelium of HPV16<sup>tg/+</sup> and HPV16<sup>tg/+</sup>;Krt17<sup>-/-</sup> mice at 1-mo post-implantation. Nuclei are stained with DAPI (blue). Dotted line separates epithelium (above line) from underlying stroma (below line). Bar = 100  $\mu$ m.

# Supplementary Fig. S3

A

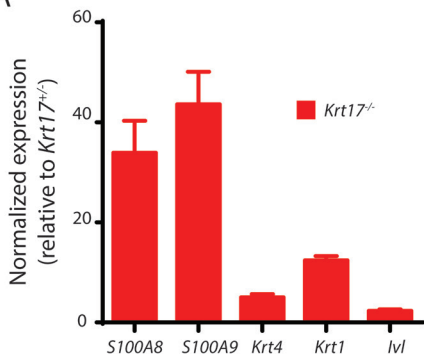

B

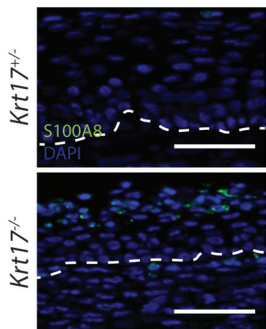

## Supplementary Fig. S3: Differentiation of cervical epithelia occurs in non-transgenic, unimplanted, aged mice in the absence of K17. A)

Normalized expression for differentiation-associated gene transcripts in cervical tissue of *Krt17*<sup>-/-</sup> mice relative to *Krt17*<sup>+/-</sup> littermates. Error bars are s.e.m.

B) Immunostaining for S100A8 in transformation zone epithelium of *Krt17*<sup>+/-</sup> (top) and *Krt17*<sup>-/-</sup> (bottom) mice. Nuclei are stained with DAPI (blue). Dotted line separates epithelium (above line) from underlying stroma (belowline). Bar = 100  $\mu$ m.

**Table S1. List of qRT-PCR primers.**

| Target        | Primer  | Sequence (5'-->3')      | Target        | Primer  | Sequence (5'-->3')      |
|---------------|---------|-------------------------|---------------|---------|-------------------------|
| <i>18S</i>    | Forward | CCTGTGCCTTCCTTGGA       | <i>Inv</i>    | Forward | ATGTCCCATCAACACACTG     |
| <i>18S</i>    | Reverse | CATTCGAACGTCTGCCCTATC   | <i>Inv</i>    | Reverse | TGGAGTTGGTTGCTTTGCTTG   |
| <i>Actb</i>   | Forward | GGCTGTATTCCCTCCATCG     | <i>Krt1</i>   | Forward | TGGGAGATTTTCAGGAGGAGG   |
| <i>Actb</i>   | Reverse | CCAGTTGGTAACAATGCCATGT  | <i>Krt1</i>   | Reverse | GCCACACTCTTGGAGATGCTC   |
| <i>Aire</i>   | Forward | AGGTCAGCTTCAGAGAAAACCA  | <i>Krt4</i>   | Forward | TCGGCAGCAGAAGTCTTTACA   |
| <i>Aire</i>   | Reverse | TCATTCCCAGCACTCAGTAGA   | <i>Krt4</i>   | Reverse | CAGCACCGTATCTCCAACG     |
| <i>Cdh1</i>   | Forward | CAGGTCTCCTCATGGCTTTGC   | <i>Krt10</i>  | Forward | ACGAGAAGCATGGCAACTCAA   |
| <i>Cdh1</i>   | Reverse | CTTCCGAAAAGAAGGCTGTCC   | <i>Krt10</i>  | Reverse | GCTCATCCAGTACCCTGCG     |
| <i>Ctnnb1</i> | Forward | ATGGACGTGGGGCAACTTTTA   | <i>Krt17</i>  | Forward | ACCATCCGCCAGTTTACCTC    |
| <i>Ctnnb1</i> | Reverse | CGCCATCCCTGTCAATAATCTG  | <i>Krt17</i>  | Reverse | CTACCCAGGCCACTAGCTGA    |
| <i>Cxcl10</i> | Forward | CCAAGTGCTGCCGTCATTTTC   | <i>Lamb1</i>  | Forward | AGACTTTGGGGGTTTCATGTCA  |
| <i>Cxcl10</i> | Reverse | GGCTCGCAGGGATGATTTCAA   | <i>Lamb1</i>  | Reverse | ATCGTCCCGTCTCCTTGTC     |
| <i>Cxcl11</i> | Forward | GGCTTCCTTATGTTCAAACAGGG | <i>Mmp13</i>  | Forward | TGTTTGACAGAGCACTACTTGAA |
| <i>Cxcl11</i> | Reverse | GCCGTTACTCGGGTAAATTACA  | <i>Mmp13</i>  | Reverse | CAGTACCTCTAAGCCAAAGAAA  |
| <i>Cxcl5</i>  | Forward | TCCAGCTCGCCATTCATGC     | <i>Mmp9</i>   | Forward | CTGGACAGCCAGACACTAAAG   |
| <i>Cxcl5</i>  | Reverse | TTGCGGCTATGACTGAGGAAG   | <i>Mmp9</i>   | Reverse | CTCGGGCAAGTCTTCAGAG     |
| <i>Cxcl9</i>  | Forward | TCCTTTTGGGCATCATCTTCC   | <i>Mtor</i>   | Forward | CAGTTCGCCAGTGGACTGAAG   |
| <i>Cxcl9</i>  | Reverse | TTGTAGTGGATCGTGCCTCG    | <i>Mtor</i>   | Reverse | GCTGGTCATAGAAGCGAGTAGAC |
| <i>Epcam</i>  | Forward | GCGGCTCAGAGAGACTGTG     | <i>Notch1</i> | Forward | GATGGCCTCAATGGGTACAAG   |
| <i>Epcam</i>  | Reverse | CCAAGCATTTAGACGCCAGTTT  | <i>Notch1</i> | Reverse | TCGTTGTTGTTGATGTCACAGT  |
| <i>Flg</i>    | Forward | ATGTCCGCTCTCTGGAAAG     | <i>Patch1</i> | Forward | CTTCCACCCACAGTCTCTCC    |
| <i>Flg</i>    | Reverse | TGGATTCTTCAAGACTGCCTGTA | <i>Patch1</i> | Reverse | GGGAAGGCTACTGGCCGG      |
| <i>Hes1</i>   | Forward | CCAGCCAGTGTCAACACGA     | <i>Rictor</i> | Forward | GCTGCGTATCTCATCCAAGA    |
| <i>Hes1</i>   | Reverse | AATGCCGGGAGCTATCTTTCT   | <i>Rictor</i> | Reverse | CTTTCTGACTAAGCGAAGGGC   |
| <i>Hey1</i>   | Forward | GCGCGGACGAGAATGGAAA     | <i>Rptor</i>  | Forward | TGTGAGAAAATCGAAGGCTCC   |
| <i>Hey1</i>   | Reverse | TCAGGTGATCCACAGTCATCTG  | <i>Rptor</i>  | Reverse | TTTGCACCGATGGTTTCCAGA   |
| <i>Hip1</i>   | Forward | CCACTTGATTGAACGCCTGTA   | <i>S100a8</i> | Forward | AAATCACCATGCCCTCTACAAG  |
| <i>Hip1</i>   | Reverse | ACTCGCAGTCATCCATAGCCT   | <i>S100a8</i> | Reverse | CCCACTTTTATCACCATCGCAA  |
| <i>Hnrnpk</i> | Forward | ACTGATGAGATGGTTGAATTGCG | <i>S100a9</i> | Forward | ATACTCTAGGAAGGAAGGACACC |
| <i>Hnrnpk</i> | Reverse | CTGGCATTGTAGTCTGTACGG   | <i>S100a9</i> | Reverse | TCCATGATGTCATTTATGAGGGC |
| <i>Ido1</i>   | Forward | GCTTTGCTCTACCACATCCAC   | <i>Sfn</i>    | Forward | TTGGCTGAACAGGCCGAAC     |
| <i>Ido1</i>   | Reverse | CAGGCGCTGTAACCTGTGT     | <i>Sfn</i>    | Reverse | GTAAGCTACGGAAAGCAGGTTT  |
| <i>lfng</i>   | Forward | ATGAACGCTACACACTGCATC   | <i>Tgfb</i>   | Forward | CTCCCGTGGCTTCTAGTGC     |
| <i>lfng</i>   | Reverse | CCATCCTTTTGCCAGTTCCTC   | <i>Tgfb</i>   | Reverse | GCCTTAGTTTGGACAGGATCTG  |
| <i>Il1b</i>   | Forward | GAAATGCCACCTTTTGACAGT   | <i>Tnfa</i>   | Forward | CTGAACTTCGGGGTGATCGG    |
| <i>Il1b</i>   | Reverse | CTGGATGCTCTCATCAGGACA   | <i>Tnfa</i>   | Reverse | GGCTTGCTCACTCGAATTTGAGA |
| <i>Il17a</i>  | Forward | TTTAACTCCCTTGGCGCAAAA   |               |         |                         |
| <i>Il17a</i>  | Reverse | CTTCCCTCCGATTGACAC      |               |         |                         |
